# Supplementary material for: Interaction of a dinoflagellate neurotoxin with voltage-activated ion channels in a marine diatom
Source: PubMed Central journal article supplement (PMC5888156; doi:10.7717/peerj.4533), 2018-04-03
Supplement: peerj-06-4533-s002.pdf [file peerj-06-4533-s002.pdf]

NaChBac (BAB05220.1)  
*NsvBa* (AFV25941.1)  
*A. coffeaeformis*, CCMP127 (#8654)  
*Attheya* sp. CCMP212 (JK727018.1)  
*C. neogracile*, CCMP1317 (#1738)  
*C. tenuis*, ECT3854 (#19357)  
*Nitzschia* sp. RCC80 (#24521)  
*O. aurita* (#27960)  
*O. sinensis* (#4108)  
*O. sinensis* (#4642)  
*O. sinensis* (#948)  
*P. tricornutum* (XM\_002186019.1)  
*P. tricornutum* (XM\_002186252.1)  
*P. tricornutum* (XP\_002186317.1)  
*S. costatum*, Strain 1716 (#9006)  
*S. unipunctata*, CCMP2910 (#7034)  
*T. pseudonana* (XM\_002287783.1)  
*T. pseudonana* (XM\_002287257.1)  
*T. weissflogii*, CCMP1010 (#6343)

NaChBac (BAB05220.1)  
*NsvBa* (AFV25941.1)  
*A. coffeaeformis*, CCMP127 (#8654)  
*Attheya* sp. CCMP212 (JK727018.1)  
*C. neogracile*, CCMP1317 (#1738)  
*C. tenuis*, ECT3854 (#19357)  
*Nitzschia* sp. RCC80 (#24521)  
*O. aurita* (#27960)  
*O. sinensis* (#4108)  
*O. sinensis* (#4642)  
*O. sinensis* (#948)  
*P. tricornutum* (XM\_002186019.1)  
*P. tricornutum* (XM\_002186252.1)  
*P. tricornutum* (XP\_002186317.1)  
*S. costatum*, Strain 1716 (#9006)  
*S. unipunctata*, CCMP2910 (#7034)  
*T. pseudonana* (XM\_002287783.1)  
*T. pseudonana* (XM\_002287257.1)  
*T. weissflogii*, CCMP1010 (#6343)

Selectivity Filter

NaChBac (BAB05220.1)  
*NsvBa* (AFV25941.1)  
*A. coffeaeformis*, CCMP127 (#8654)  
*Attheya* sp. CCMP212 (JK727018.1)  
*C. neogracile*, CCMP1317 (#1738)  
*C. tenuis*, ECT3854 (#19357)  
*Nitzschia* sp. RCC80 (#24521)  
*O. aurita* (#27960)  
*O. sinensis* (#4108)  
*O. sinensis* (#4642)  
*O. sinensis* (#948)  
*P. tricornutum* (XM\_002186019.1)  
*P. tricornutum* (XM\_002186252.1)  
*P. tricornutum* (XP\_002186317.1)  
*S. costatum*, Strain 1716 (#9006)  
*S. unipunctata*, CCMP2910 (#7034)  
*T. pseudonana* (XM\_002287783.1)  
*T. pseudonana* (XM\_002287257.1)  
*T. weissflogii*, CCMP1010 (#6343)

NaChBac (BAB05220.1)  
*NsvBa* (AFV25941.1)  
*A. coffeaeformis*, CCMP127 (#8654)  
*Attheya* sp. CCMP212 (JK727018.1)  
*C. neogracile*, CCMP1317 (#1738)  
*C. tenuis*, ECT3854 (#19357)  
*Nitzschia* sp. RCC80 (#24521)  
*O. aurita* (#27960)  
*O. sinensis* (#4108)  
*O. sinensis* (#4642)  
*O. sinensis* (#948)  
*P. tricornutum* (XM\_002186019.1)  
*P. tricornutum* (XM\_002186252.1)  
*P. tricornutum* (XP\_002186317.1)  
*S. costatum*, Strain 1716 (#9006)  
*S. unipunctata*, CCMP2910 (#7034)  
*T. pseudonana* (XM\_002287783.1)  
*T. pseudonana* (XM\_002287257.1)  
*T. weissflogii*, CCMP1010 (#6343)

NaChBac (BAB05220.1)  
*NsvBa* (AFV25941.1)  
*A. coffeaeformis*, CCMP127 (#8654)  
*Attheya* sp. CCMP212 (JK727018.1)  
*C. neogracile*, CCMP1317 (#1738)  
*C. tenuis*, ECT3854 (#19357)  
*Nitzschia* sp. RCC80 (#24521)  
*O. aurita* (#27960)  
*O. sinensis* (#4108)  
*O. sinensis* (#4642)  
*O. sinensis* (#948)  
*P. tricornutum* (XM\_002186019.1)  
*P. tricornutum* (XM\_002186252.1)  
*P. tricornutum* (XP\_002186317.1)  
*S. costatum*, Strain 1716 (#9006)  
*S. unipunctata*, CCMP2910 (#7034)  
*T. pseudonana* (XM\_002287783.1)  
*T. pseudonana* (XM\_002287257.1)  
*T. weissflogii*, CCMP1010 (#6343)
