# Supplementary material for: Interaction of a dinoflagellate neurotoxin with voltage-activated ion channels in a marine diatom
Source: PeerJ. 2018 Apr 3;6:e4533. doi: 10.7717/peerj.4533 (PMC5888156; doi:10.7717/peerj.4533)
Supplement: Table S1 [file peerj-06-4533-s003.xls]

## Sheet: Sheet1
Taxonomic Group	Class	Organism	Sequence Accession Number	Database Searched	Sequence Annotation	Sequence Length (amino acids)	Query Cover	% Identity	E-value	Bit-Score	Resource Type	Reference
Metazoa	Anthozoa	Exaiptasia pallida (sea anemone)	AAB96953.1	NCBI nr	sodium channel protein 1 brain-like	1810	S: 97%; R: 92%; D: 93%	S: 44%; R: 41%; D: 31%	S: 0.0; R: 0.0; D: 3e-98	S: 919; R: 838; D: 350	cDNA	White et al. (1998)
	Actinopteri	Danio rerio (zebrafish Nav1.6)	XP_009295149.1	NCBI nr	sodium channel, voltage gated, type VIII, alpha subunit a isoform X3	1949	S: 91%; R: 95%; D: 87%	S: 46%; R: 69%; D: 31%	S: 0.0; R: 0.0; D: 5e-91	S: 1,449; R: 2,520; D: 764	Genome	Howe et al. (2013)
	Mammalia	Homo sapiens (human Nav1.9)	CAA58042.1	NCBI nr	sodium channel alpha subunit	1977	S: 89%; R: 97%; D: 98%	S: 50%; R: 69% ; D: 30%	S: 0.0; R: 0.0; D: 8e-98	S: 1,573; R:2,442; D: 1,011	cDNA	Klugbauer et al. (1995)
	Cephalopoda	Heterololigo bleekeri (squid)	BAA03398.1	NCBI nr	sodium channel	1522	S: 100%; R: 90%; D: 89%	S: 100%; R: 41%; D: 32%	S: 0.0; R: 0.0; D: 5e-104	S: 3,140; R: 1,144; D: 654	cDNA	Sato and Matsumoto (1995)
	Mammalia	Mus musculus (mouse Nav1.5)	CAB70096.1	NCBI nr	voltage-gated sodium channel	2019	S: 94%; R: 97%; D: 90%	S: 46%; R: 65%; D: 31%	S: 0.0; R: 0.0; D: 4e-97	S: 1,373; R: 2,348; D: 902	cDNA	Zimmer et al. (2002)
	Mammalia	Rattus norvegicus (rat Nav1.2)	CAA27287.1	NCBI nr	sodium channel protein type 2 subunit alpha	2005	S: 91%; R: 96%; D:92%	S: 48%; R: 72%; D: 33%	S: 0.0; R: 0.0; D: 5e-100	S: 1,454; R: 2,673; D: 1,003	cDNA	Noda et al. (1986)
	Mammalia	Rattus norvegicus (rat Nav1.7)	AAB80701.1	NCBI nr	voltage-gated sodium channel	1984	S: 89%; R: 93%; D: 98%	S: 50%; R: 72%; D: 30%	S: 0.0; R: 0.0; D: 2e-98	S: 1,548; R: 2,434; D: 1,014	cDNA	Sangameswaran et al. (1997)
Choanoflagellate	Choanoflagellatea	Monosiga brevicollis	XP_001743090.1	NCBI nr	hypothetical protein	1498	S: 92%; R: 73%; D: 79%	S: 37%; R: 40%; D: 33%	S: 3e-167; R: 2e-161; D: 5e-106	S: 1,103; R: 1,158; D: 940	Genome	King et al. (2008)
Perkinsozoa	Perkinsea	Perkinsus marinus ATCC 50983	XP_002776392.1	NCBI nr	voltage-gated cation channel, putative	1686	S: 87%; R: 80% ; D: 86%	S: 27%; R: 27% ; D: 31%	S: 1e-76; R: 4e-80; D: 2e-80	S: 858; R: 807; D: 858	Genome	El-Sayed et al. (unpublished)
Dinoflagellate	Dinophyceae	Karenia brevis	SP1-20130916|287987	Local		1634		S: 25%; R: 24%; D: 23%	S: 9e-60; R: 4e-64 ; D: 1e-48	S: 228; R: 243; D: 192	Transcriptome	Ryan et al. (2014)
	Dinophyceae	Symbiodinium sp. A1	GAKY01070913.1	NCBI TSA	Locus_15995_Transcript_2/3_Confidence_0.571 transcribed RNA sequence	2320	S: 87%; R: 65%; D: 89%	S: 29%; R: 30%; D: 25%	S: 2e-46; R: 2e-42; D: 1e-41	S: 566; R: 578; D: 249	Transcriptome	Baumgarten et al. (2013)
Ciliates	Oligohymenophorea	Ichthyophthirius multifiliis	XP_004035037.1	NCBI nr	hypothetical protein IMG5_107710	1831	S: 90%; R: 84%; D: 96%	S: 28%; R: 27%; D: 28%	S: 2e-147; R: 6e-141; D: 1e-89	S: 493; R: 614; D: 751	Genome	Coyne et al. (2011)
	Spirotrichea	Oxytricha trifallax	EJY83225.1	NCBI nr	Sodium channel protein type 5 subunit alpha (macronuclear)	2191	S: 90%; R: 81%; D: 91%	S: 28%; R: 29%; D: 34%	S: 2e-147; R: 5e-123; D: 1e-109	S: 493; R: 857; D: 1,101	Genome	Swart et al. (2013)
Stramenopiles	Oomycetes	Albugo laibachii Nc14	CCA23261.1	NCBI nr	hypothetical protein ALNC14_094040	1804	S: 96%; R: 92%; D: 97%	S: 26%; R: 25%; D: 32%	S: 3e-140; R: 2e-128; D: 4e-113	S: 642; R: 749; D: 995	Genome	Kemen et al. (2011)
	Oomycetes	Phytophthora sojae	XP_009533651.1	NCBI nr	hypothetical protein PHYSODRAFT_337677	1716	S: 89%; R: 72%; D: 94%	S: 31%; R: 33%; D: 37%	S: 5e-109; R: 1e-105; D: 6e-141	S: 1,036; R: 949; D: 1,421	Genome	Tyler et al. (2006)
	Phaeophyceae	Ectocarpus siliculosus	CBJ26318.1	NCBI nr	Voltage Gated Calcium/Sodium Channel subunit alpha	1986	S: 92%; R: 81%; D: 92%	S: 28%; R: 29%; D: 40%	S: 7e-103; R: 1e-77; D: 1e-152	S: 1,131; R: 1,122; D: 1,410	Genome	Cock et al. (2010)
	Bacillariophyceae	Amphora coffeaeformis, CCMP127 ^	MMETSP0316-20121206 #8654_1	Local		381		S: 24%; R: 25%; D: 29%; B: 32%	S: 2e-08; R: 3e-12; D: 8e-07; B: 4e-31	S: 57; R: 69; D: 52; B: 117	Transcriptome	http://imicrobe.us
	Coscinodiscophyceae	Attheya sp. CCMP212^	JK727018.1	NCBI EST	Attheya sp. CCMP212 cDNA, mRNA sequence	180	S: N/A; R: N/A; D: N/A; B: 54%	S: N/A; R: N/A; D: N/A; B: 36%	S: N/A; R: N/A; D: N/A; B: 2e-22	S: N/A; R: N/A; D: N/A; B: 89	Expressed Sequence Tag	Raymond and Kim (2012)
	Mediophyceae	Chaetoceros neogracile, CCMP1317 ^	MMETSP0754-20121128 #1738_1	Local		498		S: 21%; R: 26%; D: 30%; B: 24%	S: 1e-07; R: 3e-07; D: 3e-04; B: 3e-18	S: 56; R: 55; D: 45; B: 84	Transcriptome	http://imicrobe.us
	Bacillariophyceae	Cyclophora tenuis, ECT3854 ^	MMETSP0397-20121206 #19357_1	Local		238		S: 23%; R: 27%; D: 30%; B: 29%	S: 6e-07; R: 2e-06; D: 0.039; B: 2e-20	S: 51; R: 50; D: 36; B: 86	Transcriptome	http://imicrobe.us
	Bacillariophyceae	Nitzschia sp. RCC80 ^	MMETSP0014_2-20120614 #24521_1	Local		592		S: 25%; R: 23%; D: 24%; B: 28%	S: 2e-06; R: 4e-07; D: 0.001; B: 5e-24	S: 52; R: 56; D: 44; B: 101	Transcriptome	http://imicrobe.us
	Mediophyceae	Odontella aurita, strain 1302-5 ^	MMETSP0015_2-20120614 #27960_1	Local		443		S: 24%; R: 29%; D: 28%; B: 34%	S: 5e-08; R: 7e-14; D: 2e-07; B: 1e-30	S: 57; R: 76; D: 55; B: 119	Transcriptome	http://imicrobe.us
	Mediophyceae	Odontella sinensis, Grunow 1884 ^	MMETSP0160_2-20130417 #4108_1	Local		391		S: 24%; R: 25%; D: 30%; B: 34%	S: 2e-08; R: 2e-09; D: 3e-04; B: 3e-31	S: 57; R: 60; D: 43; B: 118	Transcriptome	http://imicrobe.us
			MMETSP0160_2-20130417 #4642_1	Local		371		S: 28%; R: 27%; D: 28%; B: 34%	S: 8e-09; R: 8e-12; D: 1e-09; B: 2e-22	S: 58; R: 68; D: 61; B: 94	Transcriptome	http://imicrobe.us
			MMETSP0160_2-20130417 #948_1	Local		407		S: 27%; R: 28%; D: 28%; B: 34%	S: 3e-05; R: 5e-06; D: 3e-08; B: 3e-23	S: 47; R: 50; D: 56; B: 97	Transcriptome	http://imicrobe.us
	Bacillariophyceae	Phaeodactylum tricornutum CCMP1055 ^	XP_002186055.1	NCBI nr	bacterial type voltage activated sodium channel	415	S: 16%; R: N/A; D: N/A; B: 89%	S: 26%; R: N/A; D: N/A; B: 34%	S: 1e-12; R: N/A; D: N/A; B: 2e-32	S: 70.5; R: N/A; D: N/A; B: 121	Genome	Bowler et al. (2008), Verret et al. (2010)
			XP_002186288.1	NCBI nr	bacterial type voltage activated sodium channel	718	S: 36%; R: 25%; D: N/A; B: 79%	S: 22%; R: 23%; D: N/A; B: 35%	S: 3e-11; R: 6e-13; D: N/A; B: 1e-28	S: 120; R: 139; D: N/A; B: 113	Genome	Bowler et al. (2008), Verret et al. (2010)
			XP_002186317.1	NCBI nr	cation channel protein	469	S: 10%; R: 7%; D: 9%; B: N/A	S: 26%; R: 28%; D: 30%; B: N/A	S: 3e-10; R: 1e-6; D: 7e-10; B: N/A	S: 63; R: 52; D: 62; B: N/A	Genome
	Mediophyceae	Skeletonema costatum, strain 1716 ^	MMETSP0013_2-20120614 #9006_1	Local		358		S: 25%; R: 27%; D: 31%; B: 34%	S: 9e-12; R: 4e-10; D: 3e-09; B: 4e-30	S: 69; R: 64; D: 61; B: 116	Transcriptome	http://imicrobe.us
	Bacillariophyceae	Striatella unipunctata, CCMP2910 ^	MMETSP0800-20121206 #7034_1	Local		449		S: 21%; R: 27%; D: 23%; B: 31%	S: 3e-09; R: 8e-14; D: 2e-07; B: 5e-33	S: 60; R: 75; D: 55; B: 124	Transcriptome	http://imicrobe.us
	Mediophyceae	Thalassiosira pseudonana CCMP1335 ^	XP_002289136.1	NCBI nr	predicted protein	1491	S: 80%; R: 52%; D: 100%; B: 93%	S: 32%; R: 31%; D: 100%; B: 27%	S: 4e-89; R: 3e-89; D: 0.0; B: 3e-14	S: 622; R: 717; D: 2,722; B: 232	Genome	Armbrust et al. (2004), Verret et al. (2010)
			XP_002287819.1	NCBI nr	predicted protein	853	S: N/A; R: N/A; D: 11%; B: 82%	S: N/A; R: N/A; D: 23%; B: 31%	S: N/A; R: N/A; D: 0.79; B: 2e-25	S: N/A; R: N/A; D: 35; B: 105	Genome	Armbrust et al. (2004), Verret et al. (2010)
			XP_002287293.1	NCBI nr	predicted protein	354	S: 15%; R: 8%; D: N/A; B: 94%	S: 24%; R: 33%; D: N/A; B: 37%	S: 9e-13; R: 1e-13; D: N/A; B: 1e-36	S: 72; R: 64; D: N/A; B: 133	Genome	Armbrust et al. (2004), Verret et al. (2010)
	Mediophyceae	Thalassiosira weissflogii, CCMP1010 ^	MMETSP1405-20130829 #6343_1	Local		399		S: 23%; R: 24%; D: 28%; B: 33%	S: 6e-09; R: 2e-08; D: 5e-08; B: 5e-26	S: 59; R: 57; D: 56; B: 104	Transcriptome	http://imicrobe.us
Chlorophyte	Mamiellophyceae	Micromonas sp. RCC299	XP_002502721.1	NCBI nr	voltage-gated ion channel superfamily	1469	S: 92%; R: 74%; D: 80%	S: 30%; R: 34%; D: 35%	S: 1e-177; R: 2e-94; D: 3e-82	S: 570; R: 1,063; D: 820	Genome	Worden et al. (unpublished)
Bacteria	Bacilli	Bacillus halodurans C-125 ^	BAB05220.1	NCBI nr	BH1501 (NaChBac)	274	S: 31%; R: 22%; D: 46%; B: 100%	S: 27%; R: 29%; D: 32%; B: 100%	S: 3e-14; R: 2e-16; D: 4e-11; B: 0.0	S: 133; R: 155; D: 162; B: 506	Genome	Ren et al. (2001)
	Bacilli	Bacillus alcalophilus ATCC 27647 ^	AFV25941.1	NCBI nr	potassium ion channel transporter (NsvBa)	277	S: 17%; R: 38%; D: 38%; B: 96%	S: 21%; R: 30%; D: 35%; B: 63%	S: 8e-07; R: 3e-17; D: 3e-12; B: 6e-111	S: 49; R: 273; D: 155; B: 318	Genome	DeCaen et al. (2014)
S: blast results with query as squid H. bleekeri Nav sequence, NCBI: BAA03398.1
R: blast results with query as rat R. norvegicus Nav1.4 sequence, NCBI: AAA41682.1
D: blast results with query as diatom Thalassiosira pseudonana 4-domain VGC, NCBI: XP_002289136
B: blast results with query as bacterium Bacillus halodurans 1-domain VGC, NCBI: BAB05220.1
^ indicates transcriptomes or genomes that were searched with BLAST using the bacterium 1-domain VCG as the query
N/A: not available, failed BLAST for the combination of the query to the subject search
